# Supplementary material
Source: publisher figshare collection journal article supplement (https://geolsoc.figshare.com/ndownloader/files/5423876)
Supplement: Supplementary file 1 [file 5423876]

Supplementary Table 4 Zircon Lu-Hf isotopic compositions from Triassic granitoids in East Kunlun,,,,,,,,,,,,,
Sample,176Yb/177Hf,2?,176Lu/177Hf,2?,176Hf/177Hf,2?,TDM1(Ga),TDM2 (Ga),(176Hf/177Hf)i,?Hf(0),?Hf(t),2?,fLu/Hf
"09dl36-1 (quartz diorite), t=243 Ma",,,,,,,,,,,,,
01,0.096614 ,0.001982 ,0.003688 ,0.000072 ,0.282551 ,0.000024 ,1.07 ,1.46 ,0.282534 ,-7.82 ,-2.99 ,0.42 ,-0.89 
02,0.184430 ,0.000658 ,0.006937 ,0.000021 ,0.282573 ,0.000025 ,1.14 ,1.45 ,0.282541 ,-7.05 ,-2.81 ,0.43 ,-0.79 
03,0.057538 ,0.001010 ,0.002362 ,0.000041 ,0.282564 ,0.000017 ,1.01 ,1.42 ,0.282554 ,-7.34 ,-2.40 ,0.30 ,-0.93 
04,0.100165 ,0.002629 ,0.003673 ,0.000091 ,0.282536 ,0.000025 ,1.09 ,1.50 ,0.282519 ,-8.36 ,-3.59 ,0.43 ,-0.89 
05,0.205598 ,0.002100 ,0.007251 ,0.000077 ,0.282550 ,0.000026 ,1.19 ,1.50 ,0.282517 ,-7.86 ,-3.65 ,0.46 ,-0.78 
06,0.183871 ,0.005685 ,0.006709 ,0.000179 ,0.282554 ,0.000021 ,1.16 ,1.49 ,0.282524 ,-7.71 ,-3.49 ,0.38 ,-0.80 
07,0.031624 ,0.000224 ,0.001203 ,0.000008 ,0.282545 ,0.000016 ,1.01 ,1.47 ,0.282540 ,-8.04 ,-3.27 ,0.28 ,-0.96 
08,0.107469 ,0.000895 ,0.004011 ,0.000028 ,0.282560 ,0.000019 ,1.06 ,1.45 ,0.282542 ,-7.49 ,-2.76 ,0.33 ,-0.88 
09,0.051325 ,0.002692 ,0.001902 ,0.000098 ,0.282556 ,0.000037 ,1.01 ,1.44 ,0.282547 ,-7.65 ,-2.60 ,0.65 ,-0.94 
10,0.167964 ,0.002793 ,0.006329 ,0.000099 ,0.282576 ,0.000020 ,1.11 ,1.44 ,0.282548 ,-6.92 ,-2.67 ,0.36 ,-0.81 
"09NM73-1(syenogranite), t=238Ma",,,,,,,,,,,,,
01,0.023989 ,0.000439 ,0.001007 ,0.000018 ,0.282437 ,0.000018 ,1.15 ,1.70 ,0.282433 ,-11.84 ,-6.82 ,0.63 ,-0.97 
02,0.013855 ,0.000080 ,0.000530 ,0.000004 ,0.282500 ,0.000014 ,1.05 ,1.55 ,0.282497 ,-9.63 ,-4.53 ,0.49 ,-0.98 
03,0.011685 ,0.000052 ,0.000471 ,0.000002 ,0.282517 ,0.000016 ,1.02 ,1.51 ,0.282515 ,-9.01 ,-3.90 ,0.56 ,-0.99 
04,0.022749 ,0.000148 ,0.000912 ,0.000006 ,0.282501 ,0.000014 ,1.06 ,1.55 ,0.282497 ,-9.57 ,-4.53 ,0.48 ,-0.97 
05,0.020349 ,0.000110 ,0.000788 ,0.000004 ,0.282515 ,0.000011 ,1.04 ,1.52 ,0.282512 ,-9.08 ,-4.02 ,0.39 ,-0.98 
06,0.020169 ,0.000096 ,0.000783 ,0.000003 ,0.282485 ,0.000015 ,1.08 ,1.59 ,0.282481 ,-10.16 ,-5.10 ,0.54 ,-0.98 
07,0.011647 ,0.000042 ,0.000468 ,0.000002 ,0.282507 ,0.000015 ,1.04 ,1.54 ,0.282505 ,-9.37 ,-4.26 ,0.51 ,-0.99 
08,0.019522 ,0.000396 ,0.000804 ,0.000017 ,0.282438 ,0.000014 ,1.14 ,1.70 ,0.282434 ,-11.81 ,-6.76 ,0.49 ,-0.98 
09,0.013710 ,0.000062 ,0.000567 ,0.000002 ,0.282500 ,0.000020 ,1.05 ,1.55 ,0.282497 ,-9.63 ,-4.53 ,0.71 ,-0.98 
10,0.013084 ,0.000072 ,0.000500 ,0.000003 ,0.282512 ,0.000012 ,1.03 ,1.53 ,0.282510 ,-9.19 ,-4.09 ,0.43 ,-0.98 
11,0.013459 ,0.000142 ,0.000545 ,0.000006 ,0.282513 ,0.000020 ,1.03 ,1.52 ,0.282511 ,-9.15 ,-4.06 ,0.71 ,-0.98 
12,0.021957 ,0.000423 ,0.000916 ,0.000018 ,0.282435 ,0.000012 ,1.15 ,1.70 ,0.282431 ,-11.93 ,-6.89 ,0.41 ,-0.97 
13,0.011468 ,0.000039 ,0.000459 ,0.000001 ,0.282479 ,0.000018 ,1.08 ,1.60 ,0.282477 ,-10.35 ,-5.24 ,0.65 ,-0.99 
14,0.022429 ,0.000122 ,0.000900 ,0.000005 ,0.282516 ,0.000014 ,1.04 ,1.52 ,0.282512 ,-9.06 ,-4.02 ,0.51 ,-0.97 
15,0.012692 ,0.000040 ,0.000485 ,0.000001 ,0.282516 ,0.000014 ,1.03 ,1.52 ,0.282514 ,-9.05 ,-3.94 ,0.51 ,-0.99 
16,0.021295 ,0.000108 ,0.000890 ,0.000004 ,0.282460 ,0.000017 ,1.12 ,1.65 ,0.282456 ,-11.03 ,-5.99 ,0.59 ,-0.97 
"09dl40-1 (porphyritic granodiorite), t=225 Ma",,,,,,,,,,,,,
01,0.024326 ,0.000173 ,0.000903 ,0.000007 ,0.282560 ,0.000016 ,0.98 ,1.43 ,0.282556 ,-7.51 ,-2.74 ,0.28 ,-0.97 
02,0.022945 ,0.000536 ,0.000859 ,0.000019 ,0.282564 ,0.000018 ,0.97 ,1.42 ,0.282561 ,-7.34 ,-2.68 ,0.32 ,-0.97 
03,0.028029 ,0.000137 ,0.001100 ,0.000006 ,0.282577 ,0.000017 ,0.96 ,1.40 ,0.282572 ,-6.90 ,-2.23 ,0.30 ,-0.97 
04,0.025272 ,0.000558 ,0.000959 ,0.000023 ,0.282607 ,0.000015 ,0.91 ,1.33 ,0.282603 ,-5.85 ,-1.10 ,0.26 ,-0.97 
05,0.023867 ,0.000312 ,0.000910 ,0.000011 ,0.282571 ,0.000012 ,0.96 ,1.40 ,0.282568 ,-7.10 ,-2.31 ,0.22 ,-0.97 
06,0.034675 ,0.000517 ,0.001326 ,0.000020 ,0.282541 ,0.000024 ,1.01 ,1.48 ,0.282536 ,-8.15 ,-3.41 ,0.42 ,-0.96 
07,0.025990 ,0.000248 ,0.000931 ,0.000005 ,0.282567 ,0.000017 ,0.97 ,1.41 ,0.282563 ,-7.25 ,-2.47 ,0.29 ,-0.97 
08,0.010157 ,0.000091 ,0.000393 ,0.000003 ,0.282555 ,0.000016 ,0.97 ,1.43 ,0.282554 ,-7.67 ,-2.76 ,0.29 ,-0.99 
09,0.009738 ,0.000038 ,0.000406 ,0.000001 ,0.282546 ,0.000026 ,0.98 ,1.46 ,0.282544 ,-7.99 ,-3.15 ,0.45 ,-0.99 
10,0.022479 ,0.000397 ,0.000869 ,0.000016 ,0.282554 ,0.000013 ,0.98 ,1.44 ,0.282551 ,-7.70 ,-2.89 ,0.23 ,-0.97 
"Note: ?Hf(0)= 10,000*[(176Hf/177Hf)S/(176Hf/177Hf)CHUR,0-1], fLu/Hf=(176Lu/177Hf)S/(176Lu/177Hf)CHUR?1. ",,,,,,,,,,,,,
"?Hf(t)= 10,000*{[(176Hf/177Hf)S?(176Lu/177Hf)S*(e?t?1)]/[(176Hf/177Hf)CHUR,0?(176Lu/177Hf)CHUR×(e?t?1)]?1).",,,,,,,,,,,,,
"TDM1 is one-stage Hf model age, calculated as TDM1=1/?*In{(1+[(176Hf/177Hf)S?(176Hf/177Hf)DM]/[(176Lu/177Hf)S?(176Lu/177Hf)DM]}.",,,,,,,,,,,,,
"TDM2 is two-stage Hf model age, calculated as TDM2=TDM1?(TDM1?t)*[(fCC?fS)/(fCC?fDM)].",,,,,,,,,,,,,
"Where, ?=1.867*10?11 yr?1 (Söderlund et al. 2004); (176Lu/177Hf)S and (176Hf/177Hf)S are the measured values of samples;
(176Lu/177Hf)CHUR=0.0332 and (176Hf/177Hf)CHUR,0=0.282772 (Blichert-Toft & Albarède 1997); (176Lu/177Hf)DM=0.0384 and (176Hf/177Hf)DM=0.28325 (Grif?n et al. 2000); (176Lu/177Hf)mean crust=0.015; fCC=[(176Lu/177Hf)mean crust/(176Lu/177Hf)CHUR]?1; fS=fLu/Hf; fDM=[(176Lu/177Hf)DM/(176Lu/177Hf)CHUR]?1; t=crystallization time of zircon
",,,,,,,,,,,,,
,,,,,,,,,,,,,
,,,,,,,,,,,,,
,,,,,,,,,,,,,
,,,,,,,,,,,,,
,,,,,,,,,,,,,
